# Supplementary material for: Novel continuous experimental evolution methodology uncovers rapid resistance development and cross-resistance
Source: Research Square preprint supplement (doi:10.21203/rs.3.rs-7980433/v1), 2025-12-04
Supplement: Supplementary file 1 [file 31546f624424750422332fc1.docx]

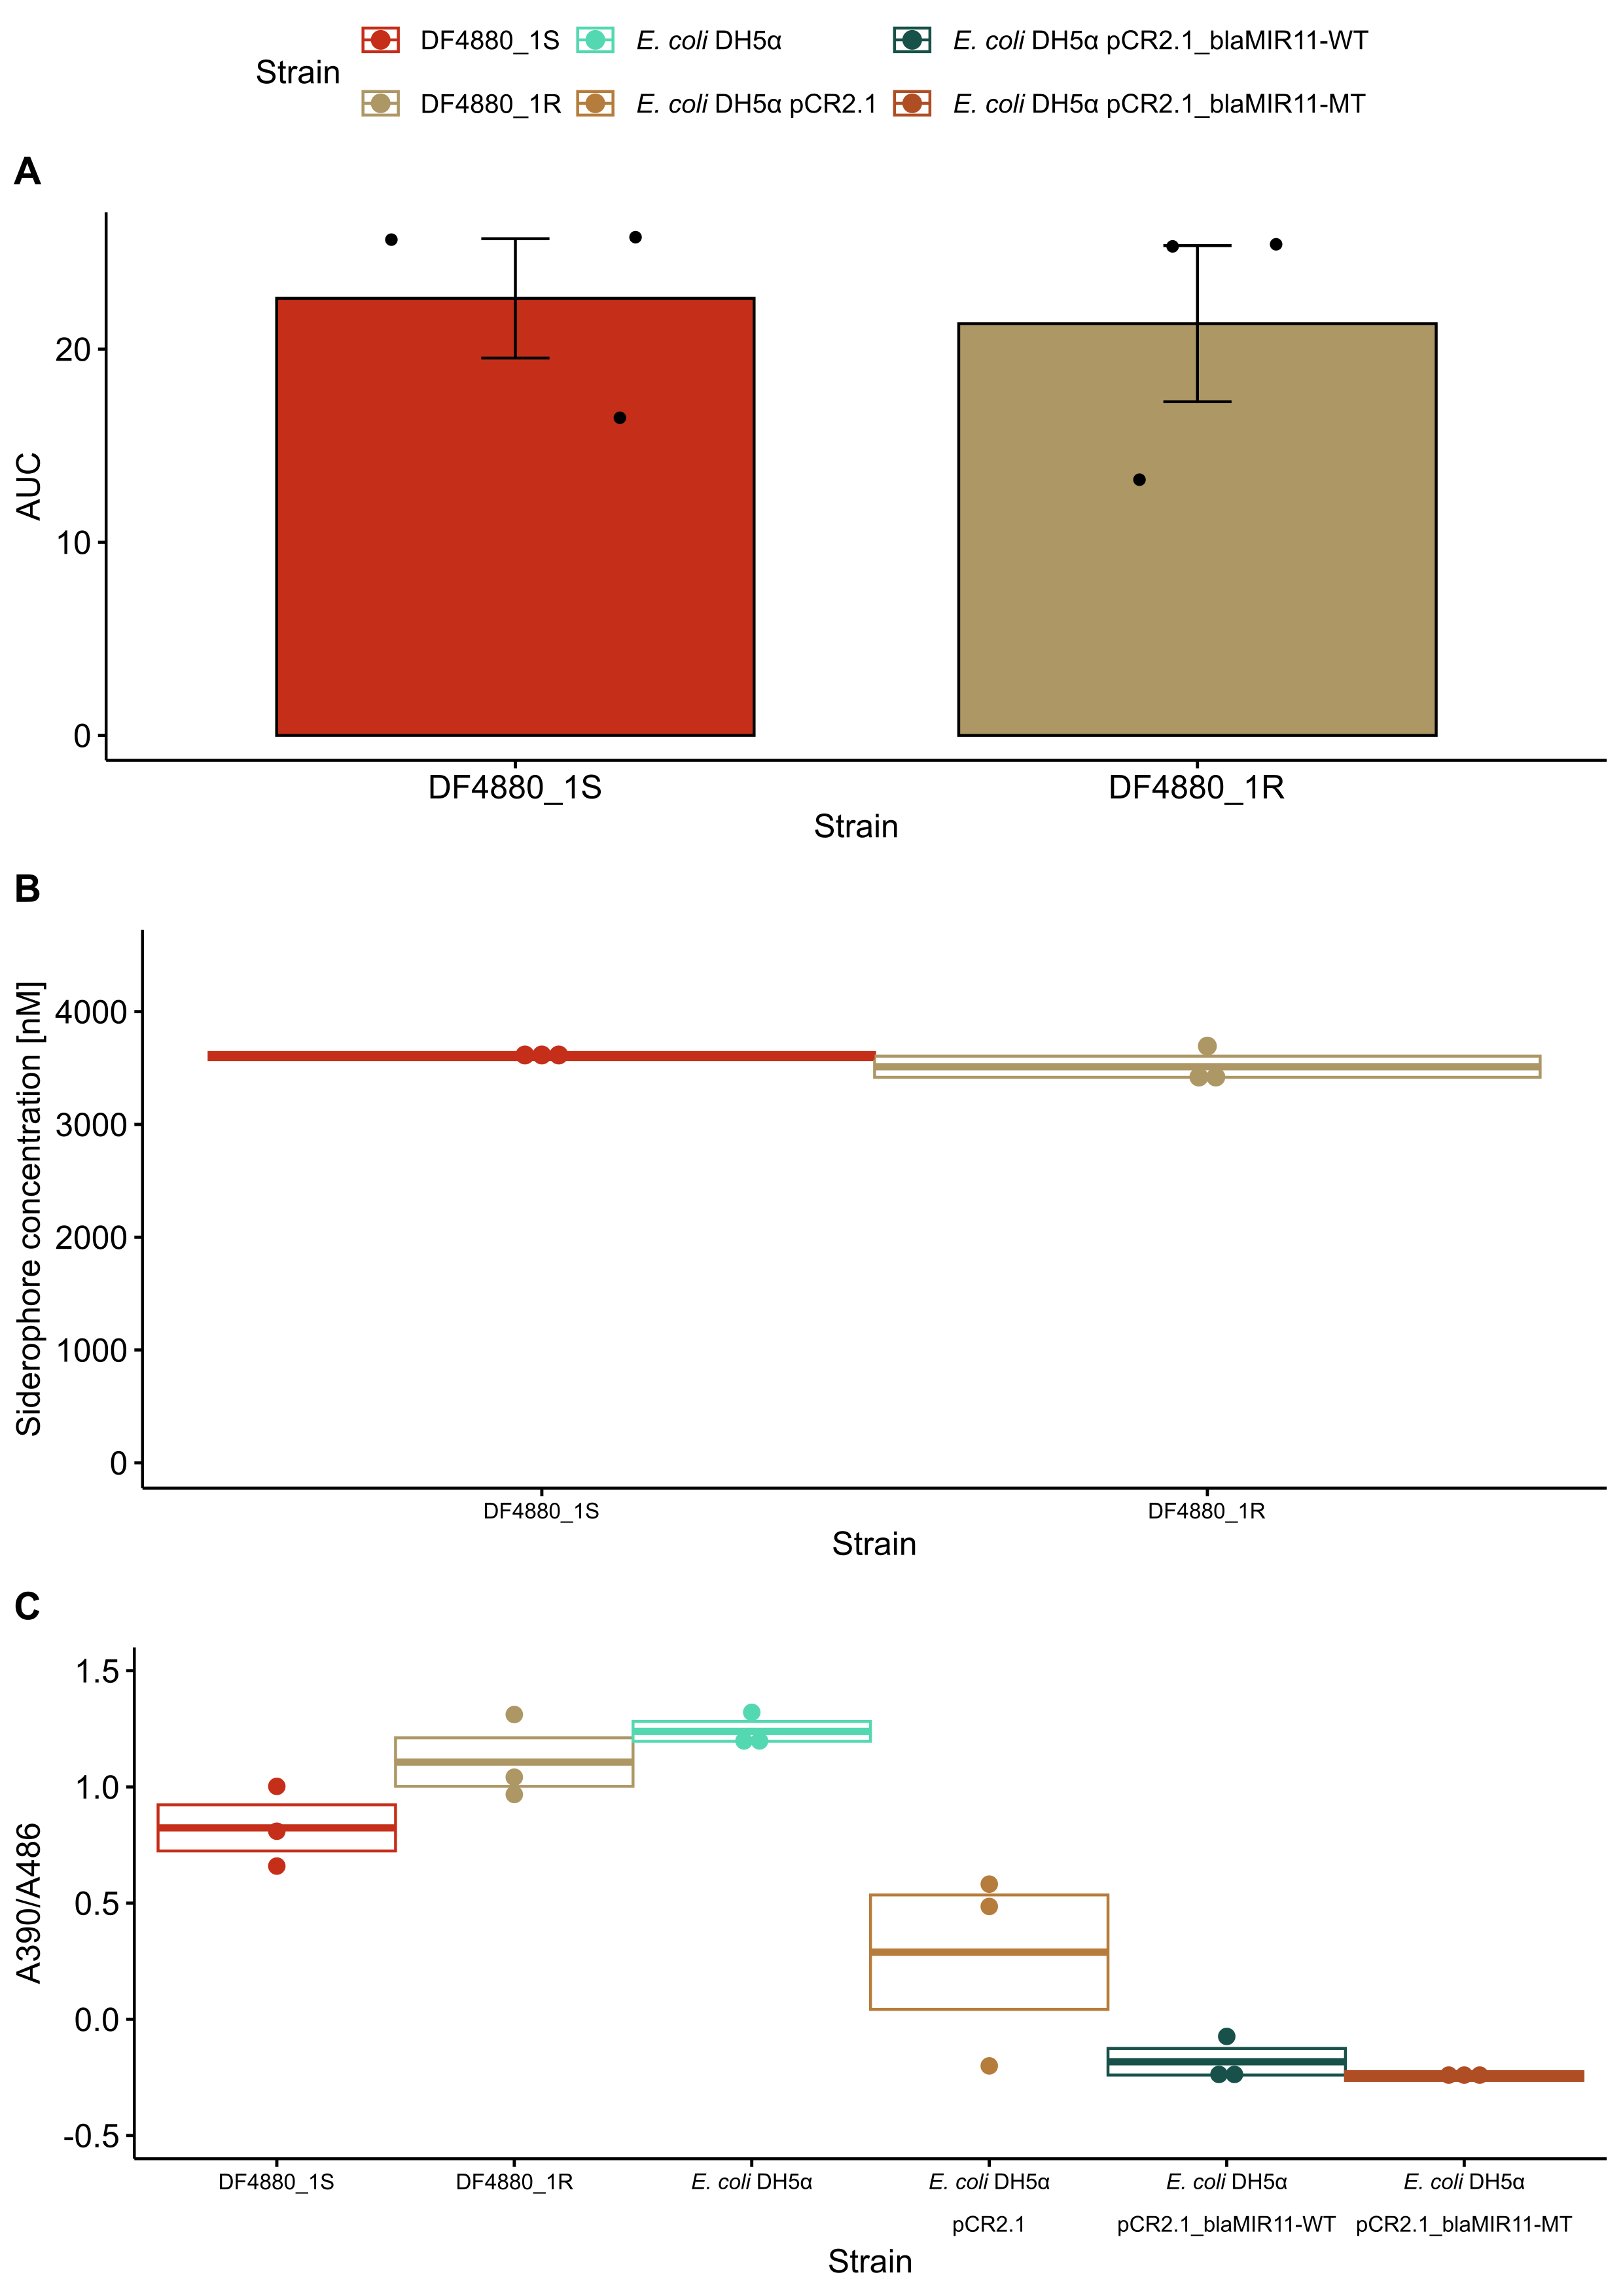


**Supplementary Figure S1: Comparative fitness and virulence assays of the cefiderocol resistant evolvant (DF4880_1R) and respective parent strain (DF4880_1S).** A: Area under the curve (AUC) of the growth kinetics in LB measured for 22 h at 37 °C every 15 min. Error bars represent standard error of the mean. B: Siderophore concentration as determined by the SideroTec-HiSens™ Assay kit (Accuplex 167 Diagnostics Ltd., Ireland). C: Ratio of the absorption at 390 nm and 486 nm of bacterial suspensions adjusted to an optical density (600 nm) of 0.5 with 0.25 mM nitrocefin after 20 min of incubation at 37 °C, normalized to the optical density (600 nm).

**Supplementary Table S1: Overview of the phenotypic resistance profile of the three initial Enterobacter cloacae complex strains used in the experimental evolution as well as the cefiderocol resistant evolvant strain and the respective parent strain.** Minimum inhibitory concentrations were determined by the 1VITEK® 2 COMPACT (bioMérieux) platform, broth microdilution assays, 2ComASP® Cefiderocol 0.008-128 μg/mL Kit (Liofilchem, Roseto degli Abruzzi, Italy), or 3Colistin Ezy MIC™ Strip (CL) 0.016 – 256 mcg/ml (HiMedia Laboratories, Mumbai, India) and interpreted according to EUCAST v15 guidelines19. n.a., not applicable.

| **Antibiotic** | **DF4880_1R** | **DF4880_1S** | **PBIO4880** | **PBIO4886** | **PBIO4914** |
| --- | --- | --- | --- | --- | --- |
| Ampicillin | n.a. | n.a. | ≥32 (R) | ≥32 (R) | ≥32 (R) |
| Cefepime1 | >16 (R) | 0.25 (S) | 0.25 (S) | 0.5 (S) | 2 (S) |
| Cefiderocol2 | >128 (R) | 2 (S) | 0.5 (S) | 0.25 (S) | 1 (S) |
| Cefotaxime | ≥64 (R) | 32 (R) | ≥64 (R) | ≥64 (R) | ≥64 (R) |
| Cefpodoxime | n.a. | n.a. | ≥8 (R) | ≥8 (R) | ≥8 (R) |
| Ceftazidime | ≥64 (R) | ≥64 (R) | ≥64 (R) | ≥64 (R) | ≥64 (R) |
| Ceftazidime/Avibactam | ≥16 (R) | 0.25 (S) | 0.5 (S) | 0.5 (S) | 0.5 (S) |
| Ceftolozane/Tazobactam | 4 (R) | 8 (R) | 8 (R) | 8 (R) | ≥32 (R) |
| Cefuroxime | n.a. | n.a. | ≥64 (R) | ≥64 (R) | ≥64 (R) |
| Ciprofloxacin | ≤0.06 (S) | ≤0.06 (S) | ≤0.06 (S) | ≤0.06 (S) | ≤0.06 (S) |
| Colistin3 | 1 (S) | 1 (S) | n.a. | n.a. | n.a. |
| Ertapenem | 0.25 (S) | 1 (R) | n.a. | n.a. | n.a. |
| Fosfomycin | n.a. | n.a. | ≥256 (R) | 32 (S) | ≤16 (S) |
| Gentamicin | ≤1 (S) | ≤1 (S) | ≤1 (S) | ≤1 (S) | ≤1 (S) |
| Imipenem | 1 (S) | 1 (S) | 1 (S) | 1 (S) | ≤0.25 (S) |
| Imipenem/Relebactam | 1 (S) | 1 (S) | 1 (S) | ≤0.25 (S) | ≤0.25 (S) |
| Meropenem | ≤0.25 (S) | ≤0.25 (S) | 0.5 (S) | ≤0.25 (S) | 1 (S) |
| Meropenem/Vaborbactam | ≤0.5 (S) | ≤0.5 (S) | ≤0.5 (S) | ≤0.5 (S) | ≤0.5 (S) |
| Piperacillin | ≥128 (R) | ≥128 (R) | n.a. | n.a. | n.a. |
| Piperacillin/Tazobactam | 64 (R) | ≥128 (R) | ≥128 (R) | ≥128 (R) | ≥128 (R) |
| Trimethoprim/Sulfamethoxazole | ≤20 (S) | ≤20 (S) | ≤20 (S) | ≤20 (S) | ≤20 (S) |

**Supplementary Table S2: Overview of strains used in this study.** ST, sequence type.

| **Strain** | **Characteristics** | **Citation** |
| --- | --- | --- |
| PBIO4880 | *E. roggenkampii* ST165 | This study |
| PBIO4886 | *E. hormaechei* ST1131 | This study |
| PBIO4914 | *E. hormaechei* ST108 | This study |
| DF4880_1S | Parent strain of first PBIO4880 replicate | This study |
| DF4880_1R | Evolvant strain of first PBIO4880 replicate | This study |
| DF4880_2S | Parent strain of second PBIO4880 replicate | This study |
| DF4880_2R | Evolvant strain of second PBIO4880 replicate | This study |
| DF4880_3S | Parent strain of third PBIO4880 replicate | This study |
| DF4880_3R | Evolvant strain of third PBIO4880 replicate | This study |
| DF4886_1S | Parent strain of first PBIO4886 replicate | This study |
| DF4886_1R | Evolvant strain of first PBIO4886 replicate | This study |
| DF4886_2S | Parent strain of second PBIO4886 replicate | This study |
| DF4886_2R | Evolvant strain of second PBIO4886 replicate | This study |
| DF4886_3S | Parent strain of third PBIO4886 replicate | This study |
| DF4886_3R | Evolvant strain of third PBIO4886 replicate | This study |
| DF4914_1S | Parent strain of first PBIO4914 replicate | This study |
| DF4914_1R | Evolvant strain of first PBIO4914 replicate | This study |
| DF4914_2S | Parent strain of second PBIO4914 replicate | This study |
| DF4914_2R | Evolvant strain of second PBIO4914 replicate | This study |
| DF4914_3S | Parent strain of third PBIO4914 replicate | This study |
| DF4914_3R | Evolvant strain of third PBIO4914 replicate | This study |
| *E. coli* DH5α | F– *φ80lacZ*ΔM15 Δ(l*acZYA-argF*)*U169* *recA1 endA1 hsdR17(rK–, mK+) phoA supE44 λ–thi-1 gyrA96* |  |
| *E. coli* DH5αpCR2.1 | *E. coli* DH5α transformed with empty pCR™2.1 Vector (Invitrogen, Waltham, United States) | This study |
| *E. coli* DH5αpCR2.1_blaMIR11-WT | *E. coli* DH5α transformed with pCR™2.1 Vector (Invitrogen, Waltham, United States)  containing the wild-type *bla*MIR-11 gene including native promotor and terminator | This study |
| *E. coli* DH5αpCR2.1_blaMIR11-MT | *E. coli* DH5α transformed with pCR™2.1 Vector (Invitrogen, Waltham, United States)  containing the mutated *bla*MIR-11 gene including native promotor and terminator | This study |

**Supplementary Table S3: Overview of primers used in this study.**

| **Primer** | **Sequences (5’-3’)** | **Usage** |
| --- | --- | --- |
| MIR11_For | CGCGAAGCGAATTAAGCG | Cloning |
| MIR11_Rev | GCGATTTCATACCATGTTCC | Cloning |
| M13_For | GTAAAACGACGGCCAGT | Cloning confirmation |
| M13_Rev | GGAAACAGCTATGACCATG | Cloning confirmation |
